# Supplementary material for: Photosynthetic Traits of Páramo Plants Subjected to Short-Term Warming in OTC Chambers
Source: MDPI journal article supplement (doi:10.3390/plants11223110), 2022-11-15
Supplement: s1 [file s1]

## Supplementary materials

### PLANTS

#### Photosynthetic traits of páramo plants subjected to short-term warming in OTC chambers

María Elena Solarte\*, Yisela Solarte Erazo, Elizabeth Ramírez Cupacán, Camila Enríquez Paz, Luz Marina Melgarejo\*, Eloisa Lasso, Jaime Flexas and Javier Gulias.

Correspondence: MES; [msolarte65@udenar.edu.co](mailto:msolarte65@udenar.edu.co); Tel.: 3214517719; +57;  
LMM; [lmelgarejom@unal.edu.co](mailto:lmelgarejom@unal.edu.co); 3133481285; +57)

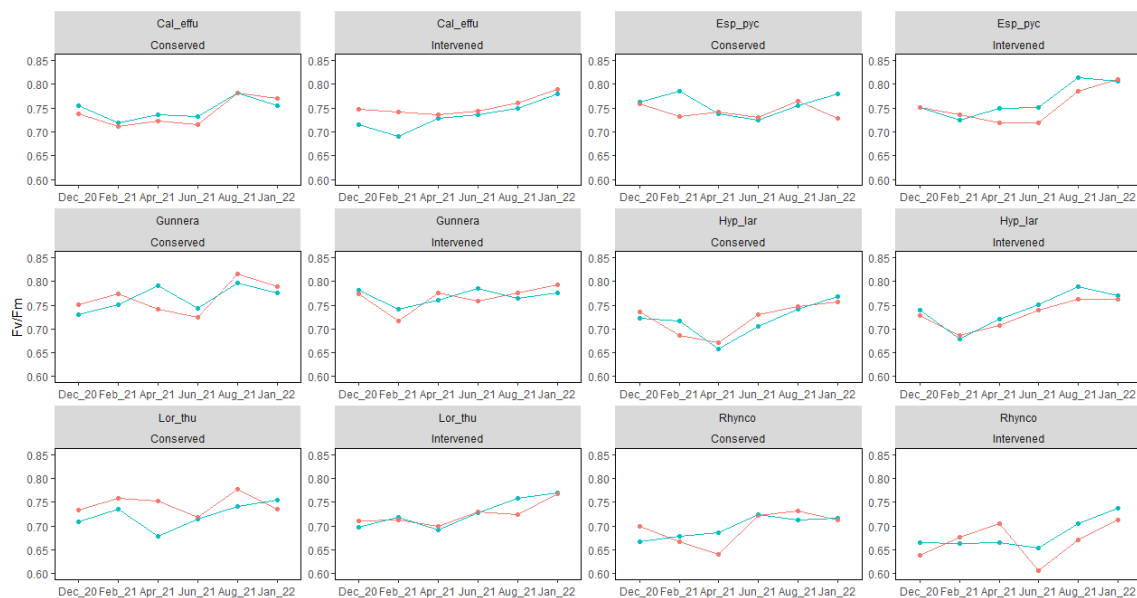

Figure S1. Maximum quantum efficiency of photosystem II (Fv/Fm) in páramo plants in the two study areas, conserved area and intervened area, subjected to passive warming in the OTC treatment (red) and control plots (blue), n = 58, p = 0.05. Cal\_effu=*Calamagrostis effusa*, Esp\_pyc=*Espeletia pycnophylla*, Gunnera=*Gunnera magellanica*, Hyp\_lar = *Hypericum laricifolium*, Lor\_thu= *Loricaria thuyoides*, Rhynco=*Rhynchospora macrochaeta*.

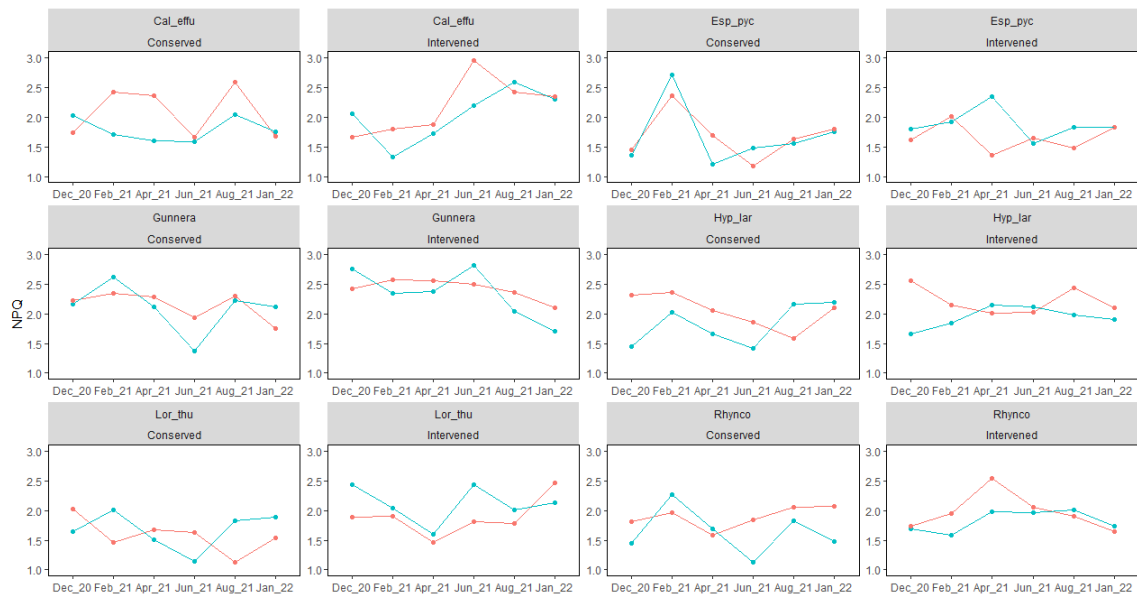

Figure S2. Non-photochemical quenching in páramo plants in the two study areas, conserved area and intervened area, subjected to passive warming in the OTC treatment (red) and control plots (blue),  $n = 58$ ,  $p = 0.05$ . Cal\_effu=*Calamagrostis effusa*, Esp\_pyc=*Espeletia pycnophylla*, Gunnera=*Gunnera magellanica*, Hyp\_lar = *Hypericum laricifolium*, Lor\_thu= *Loricaria thuyoides*, Rhynco=*Rhynchospora macrochaeta*.

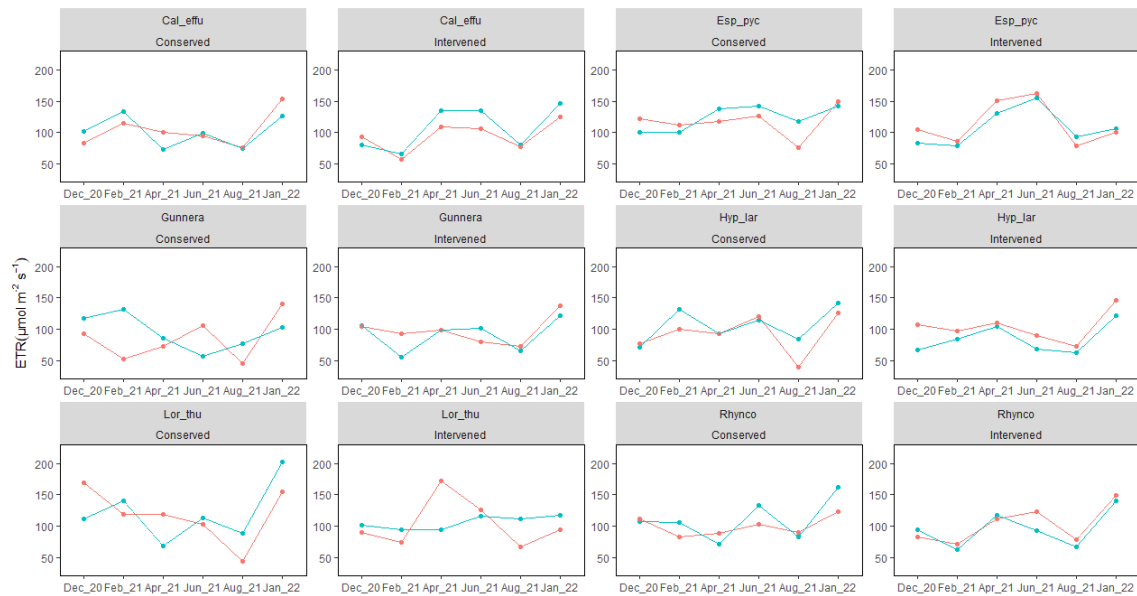

Figure S3. Electron transport rate in páramo plants in the two study areas, conserved area and intervened area, subjected to passive warming in the OTC treatment (red) and control plots (blue),  $n = 58$ ,  $p = 0.05$ . Cal\_effu=*Calamagrostis effusa*, Esp\_pyc=*Espeletia pycnophylla*, Gunnera=*Gunnera magellanica*, Hyp\_lar = *Hypericum laricifolium*, Lor\_thu= *Loricaria thuyoides*, Rhynco=*Rhynchospora macrochaeta*.

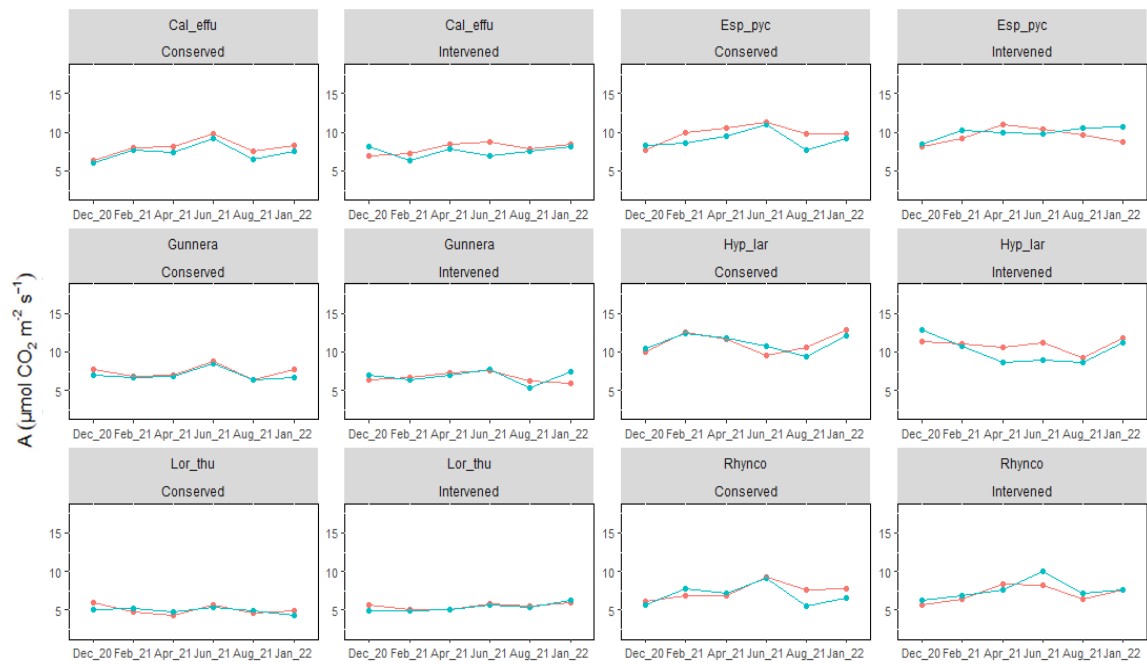

Figure S4. Photosynthesis rate in páramo plants in the two study areas, conserved area and intervened area, both subjected to passive warming in the OTC treatment (red) and without passive warming in the control plots (blue),  $n=75$ ,  $p>0.05$ . Cal\_effu=*Calamagrostis effusa*, Esp\_pyc=*Espeletia pycnophylla*, Gunnera=*Gunnera magellanica*, Hyp\_lar = *Hypericum laricifolium*, Lor\_thu= *Loricaria thuyoides*, Rhynco=*Rhynchospora macrochaeta*.

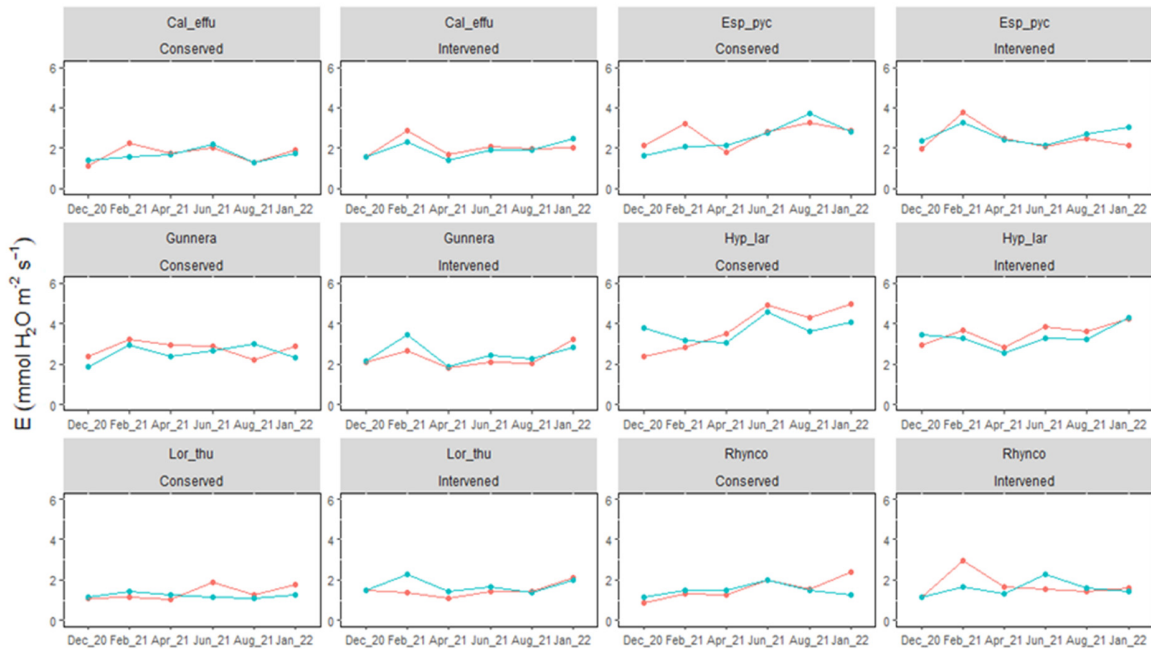

Figure S5. Transpiration rate in páramo plants in the two study areas, conserved area and intervened area, both subjected to passive warming in the OTC treatment (red) and without passive warming in the control plots (blue),  $n=75$ ,  $p>0.05$ . Cal\_effu=*Calamagrostis effusa*, Esp\_pyc=*Espeletia pycnophylla*, Gunnera=*Gunnera magellanica*, Hyp\_lar = *Hypericum laricifolium*, Lor\_thu= *Loricaria thuyoides*, Rhynco=*Rhynchospora macrochaeta*.

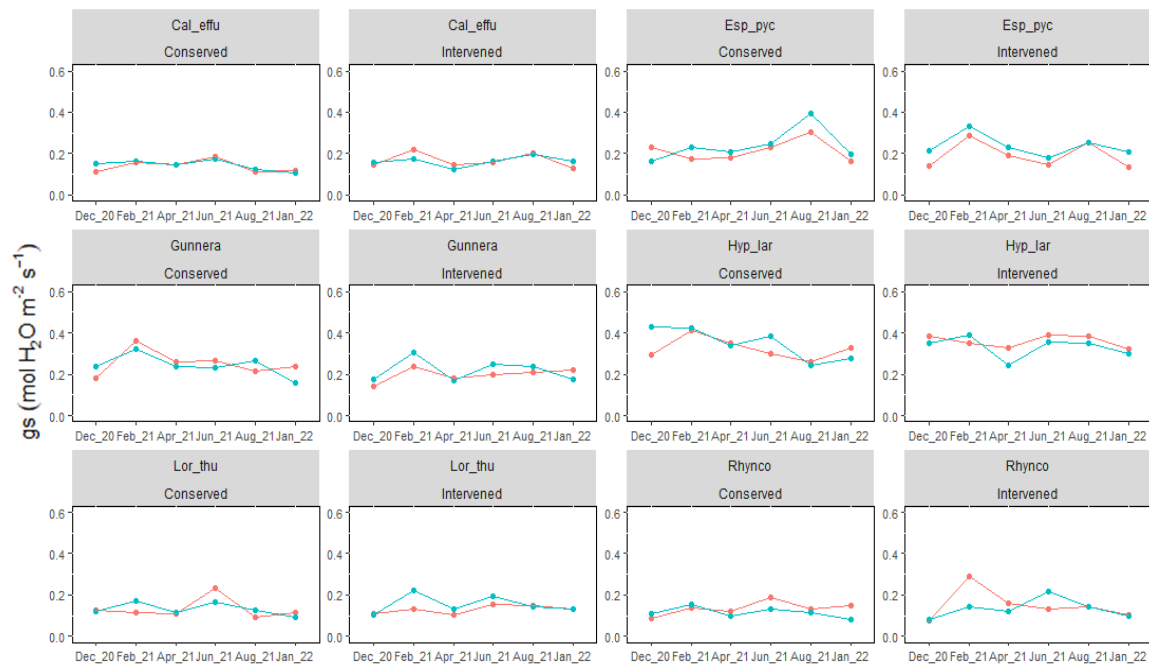

Figure S6. Stomatal conductance in páramo plants in the two study areas, conserved area and intervened area, both subjected to passive warming in the OTC treatment (red) and without passive warming in the control plots (blue),  $n=75$ ,  $p>0.05$ . Cal\_effu=*Calamagrostis effusa*, Esp\_pyc=*Espeletia pycnophylla*, Gunnera=*Gunnera magellanica*, Hyp\_lar = *Hypericum laricifolium*, Lor\_thu= *Loricaria thuyoides*, Rhynco=*Rhynchospora macrochaeta*.

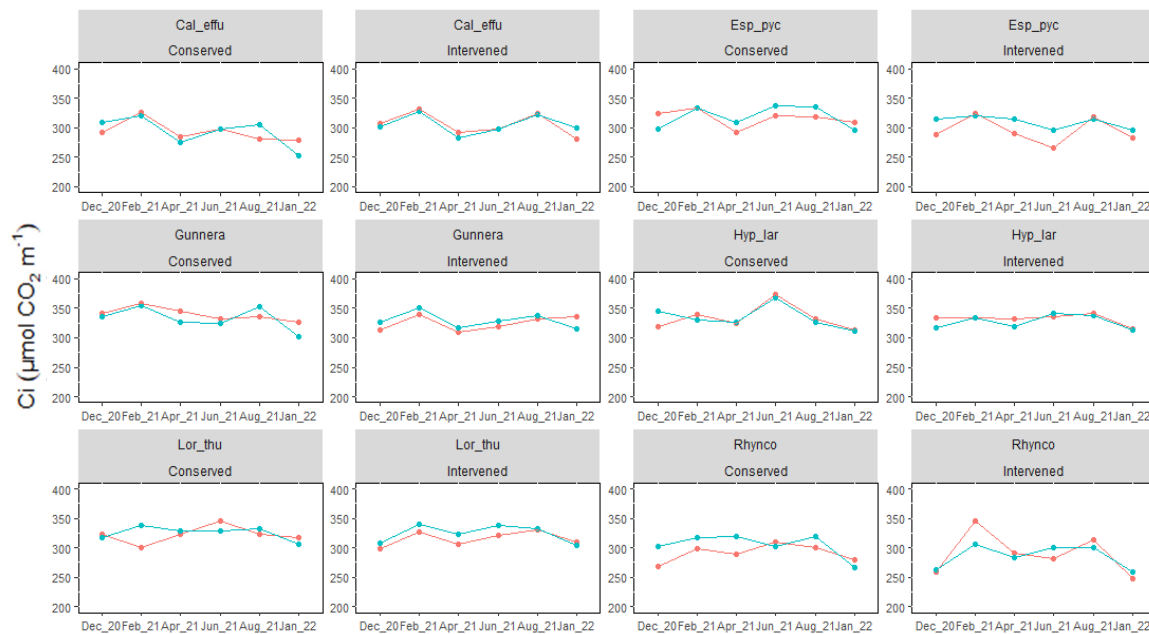

Figure S7. Intercellular CO<sub>2</sub> concentration in páramo plants in the two study areas, conserved area and intervened area, both subjected to passive warming in the OTC treatment (red) and without passive warming in the control plots (blue), n=75, p>0.05. Cal\_effu=*Calamagrostis effusa*, Esp\_pyc=*Espeletia pycnophylla*, Gunnera=*Gunnera magellanica*, Hyp\_lar = *Hypericum laricifolium*, Lor\_thu= *Loricaria thuyoides*, Rhynco=*Rhynchospora macrochaeta*.

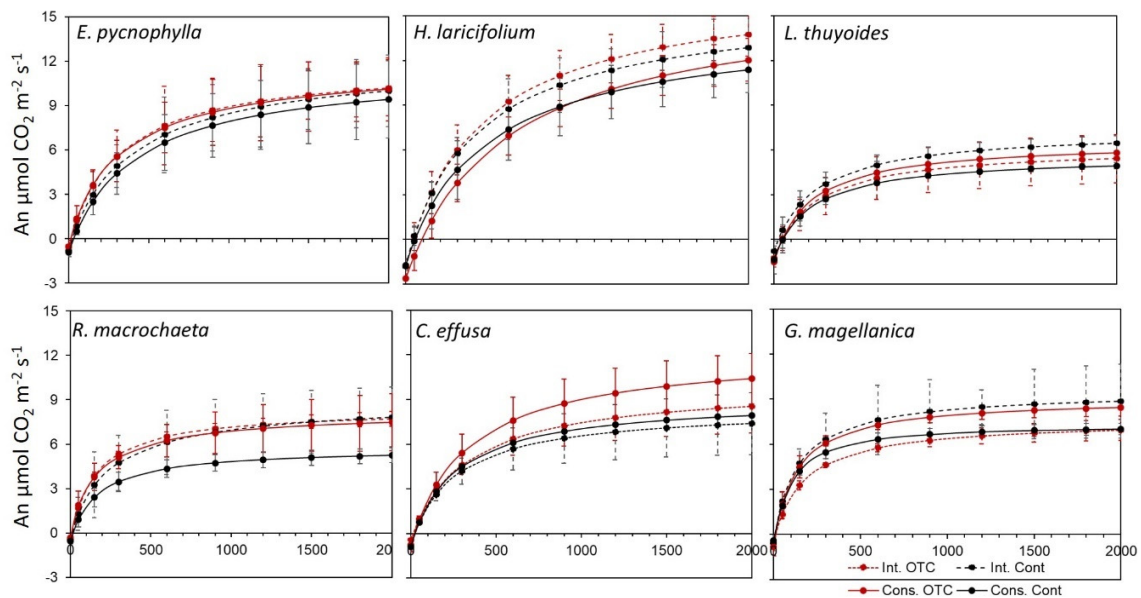

Figure S8. Light response curves in *E. pycnophylla*, *H. laricifolium*, *L. thuyoides*, *R. macrochaeta*, *C. effusa* and *G. magellanica* under the OTC treatment and control after 12 months of treatment, both in conserved and intervened areas. Int.OTC, Cons.OTC: intervened and conserved area with the OTC treatment. Int. Cont, Cons.Cont: controls without the OTC treatment of the intervened and conserved areas.

Table S1. Parameters LCP light compensation point, LSP light saturation point and apparent quantum efficiency CO<sub>2</sub>, derived from light response curves in *E. pycnophylla*, *H. laricifolium*, *L. thuyoides*, *R. macrochaeta*, *C. effusa* and *G. magellanica*, under the OTC treatment and control treatment, monitored for one year of the experiment. Values are sample means  $\pm$  standard deviation (n = 3).

| CONSERVED AREA                                        |                   |                   |                   |                   |                  |                   |                   |                  |                           |
|-------------------------------------------------------|-------------------|-------------------|-------------------|-------------------|------------------|-------------------|-------------------|------------------|---------------------------|
| LCP ( $\mu\text{mol photons m}^{-2} \text{ s}^{-1}$ ) | Dec-20            |                   | Apr-21            |                   | Aug-21           |                   | Jan-22            |                  | Treatment<br>Significance |
|                                                       | OTC               | Control           | OTC               | Control           | OTC              | Control           | OTC               | Control          |                           |
| <i>C. effusa</i>                                      | 11,7 $\pm$ 1,3    | 9,3 $\pm$ 1,9     | 27,2 $\pm$ 3,8    | 20,2 $\pm$ 2,6    | 9 $\pm$ 2,5      | 15 $\pm$ 2,1      | 19,8 $\pm$ 6,8    | 22,6 $\pm$ 0,2   | p>0.05                    |
| <i>E. pycnophylla</i>                                 | 12,1 $\pm$ 1,6    | 17,9 $\pm$ 4,1    | 23,8 $\pm$ 1,5    | 26 $\pm$ 3,9      | 16,2 $\pm$ 0,6   | 21 $\pm$ 1,1      | 22,1 $\pm$ 11,2   | 31 $\pm$ 1,6     |                           |
| <i>G. magellanica</i>                                 | 20 $\pm$ 13,8     | 15,6 $\pm$ 4      | 14 $\pm$ 1,6      | 11,3 $\pm$ 5      | 19,4 $\pm$ 4,4   | 9,2 $\pm$ 1,8     | 18,1 $\pm$ 8      | 7,3 $\pm$ 0,1    |                           |
| <i>H. laricifolium</i>                                | 37 $\pm$ 5,8      | 42,7 $\pm$ 3,5    | 16,9 $\pm$ 2,4    | 29,8 $\pm$ 0,8    | 50 $\pm$ 3,8     | 40 $\pm$ 1,3      | 73,9 $\pm$ 1,2    | 38,1 $\pm$ 10,4  |                           |
| <i>L. thuyoides</i>                                   | 20,6 $\pm$ 12,2   | 34,5 $\pm$ 13,9   | 46,8 $\pm$ 4,2    | 36,2 $\pm$ 8,5    | 61 $\pm$ 15,5    | 31,3 $\pm$ 2,5    | 32,4 $\pm$ 13,5   | 28,1 $\pm$ 4,7   |                           |
| <i>R. macrochaeta</i>                                 | 7,7 $\pm$ 0,9     | 6,9 $\pm$ 1,5     | 29,1 $\pm$ 6,3    | 42 $\pm$ 10,7     | 14,5 $\pm$ 4,9   | 9 $\pm$ 4,6       | 9,6 $\pm$ 0,1     | 17,8 $\pm$ 12,8  |                           |
| LSP ( $\mu\text{mol photons m}^{-2} \text{ s}^{-1}$ ) |                   |                   |                   |                   |                  |                   |                   |                  |                           |
| <i>C. effusa</i>                                      | 489,4 $\pm$ 70,6  | 525,7 $\pm$ 45    | 555,2 $\pm$ 219,8 | 419 $\pm$ 17,8    | 427,3 $\pm$ 17,6 | 638 $\pm$ 26,3    | 592,6 $\pm$ 18,5  | 471,9 $\pm$ 20,5 | p>0.05                    |
| <i>E. pycnophylla</i>                                 | 434,6 $\pm$ 103,8 | 707,1 $\pm$ 206,2 | 771,4 $\pm$ 92,6  | 603,6 $\pm$ 118,5 | 852,5 $\pm$ 24,1 | 879,8 $\pm$ 10,3  | 816,8 $\pm$ 56,4  | 723 $\pm$ 145,8  |                           |
| <i>G. magellanica</i>                                 | 231,9 $\pm$ 52,6  | 202,5 $\pm$ 53,9  | 277,8 $\pm$ 36,6  | 230,8 $\pm$ 86,1  | 364,2 $\pm$ 166  | 260,7 $\pm$ 20,6  | 289,8 $\pm$ 62,4  | 196,7 $\pm$ 13,8 |                           |
| <i>H. laricifolium</i>                                | 827,2 $\pm$ 25,6  | 898 $\pm$ 82,8    | 551 $\pm$ 349,7   | 740,1 $\pm$ 52,9  | 854,4 $\pm$ 18,7 | 941 $\pm$ 122,2   | 905,8 $\pm$ 56,3  | 709,3 $\pm$ 98,2 |                           |
| <i>L. thuyoides</i>                                   | 410,1 $\pm$ 40,3  | 501,7 $\pm$ 11,5  | 319,9 $\pm$ 36,7  | 286,8 $\pm$ 87,2  | 704,3 $\pm$ 24,2 | 616,1 $\pm$ 142,6 | 368,5 $\pm$ 2,6   | 386,3 $\pm$ 34,8 |                           |
| <i>R. macrochaeta</i>                                 | 302,9 $\pm$ 106,3 | 223,7 $\pm$ 64    | 354 $\pm$ 177,3   | 111,8 $\pm$ 11,8  | 623,7 $\pm$ 80,4 | 622,4 $\pm$ 97,5  | 452,5 $\pm$ 148,5 | 347,6 $\pm$ 81   |                           |

| INTERVENED AREA                                       |                   |                   |                  |                  |                  |                  |                  |                  |                        |
|-------------------------------------------------------|-------------------|-------------------|------------------|------------------|------------------|------------------|------------------|------------------|------------------------|
| LCP ( $\mu\text{mol photons m}^{-2} \text{ s}^{-1}$ ) | Dec-20            |                   | Apr-21           |                  | Aug-21           |                  | Jan-22           |                  | Treatment Significance |
|                                                       | OTC               | Control           | OTC              | Control          | OTC              | Control          | OTC              | Control          |                        |
| <i>C. effusa</i>                                      | 23 $\pm$ 2,5      | 13,7 $\pm$ 2,4    | 17,4 $\pm$ 0,8   | 22,5 $\pm$ 3,3   | 21 $\pm$ 3,2     | 10,7 $\pm$ 1,4   | 16,8 $\pm$ 1,3   | 20,4 $\pm$ 2,9   | p>0.05                 |
| <i>E. pycnophylla</i>                                 | 11,9 $\pm$ 1      | 16,3 $\pm$ 2,4    | 13,6 $\pm$ 5,8   | 13,3 $\pm$ 1     | 18,5 $\pm$ 1,2   | 17,9 $\pm$ 1,9   | 13,3 $\pm$ 0,6   | 16,9 $\pm$ 1,1   |                        |
| <i>G. magellanica</i>                                 | 13,6 $\pm$ 1,5    | 13,6 $\pm$ 3,2    | 11,6 $\pm$ 1,3   | 17,4 $\pm$ 1,7   | 15,9 $\pm$ 2     | 15,1 $\pm$ 1,5   | 9 $\pm$ 0,6      | 13,6 $\pm$ 0,8   |                        |
| <i>H. laricifolium</i>                                | 34,8 $\pm$ 2,7    | 37,8 $\pm$ 2,8    | 39,9 $\pm$ 6,1   | 36,5 $\pm$ 4     | 34,1 $\pm$ 1     | 36,2 $\pm$ 4,2   | 37,9 $\pm$ 3,4   | 39,9 $\pm$ 1,6   |                        |
| <i>L. thuyoides</i>                                   | 49,7 $\pm$ 2,8    | 41,3 $\pm$ 0,8    | 27,2 $\pm$ 0,8   | 54,7 $\pm$ 1,5   | 43,1 $\pm$ 1,2   | 42,1 $\pm$ 1,8   | 37,7 $\pm$ 5,8   | 45,3 $\pm$ 0,1   |                        |
| <i>R. macrochaeta</i>                                 | 6,9 $\pm$ 0,1     | 9 $\pm$ 0,4       | 16,3 $\pm$ 6,7   | 16 $\pm$ 5,6     | 20,1 $\pm$ 6,1   | 20,6 $\pm$ 7,8   | 11,4 $\pm$ 0,1   | 8,1 $\pm$ 0,1    |                        |
| LSP ( $\mu\text{mol photons m}^{-2} \text{ s}^{-1}$ ) |                   |                   |                  |                  |                  |                  |                  |                  |                        |
| <i>C. effusa</i>                                      | 445,3 $\pm$ 151,8 | 524,3 $\pm$ 17,5  | 434,6 $\pm$ 53,8 | 619,6 $\pm$ 3,9  | 739,9 $\pm$ 2,4  | 390,8 $\pm$ 31,1 | 298,1 $\pm$ 38,8 | 274,3 $\pm$ 18,1 | p>0.05                 |
| <i>E. pycnophylla</i>                                 | 455,8 $\pm$ 32,2  | 419,8 $\pm$ 66,2  | 352,3 $\pm$ 76,9 | 382,6 $\pm$ 81,2 | 360,8 $\pm$ 76   | 303,5 $\pm$ 39   | 328,6 $\pm$ 21,2 | 267,2 $\pm$ 14,6 |                        |
| <i>G. magellanica</i>                                 | 221,9 $\pm$ 21,5  | 192,4 $\pm$ 18    | 205,5 $\pm$ 31,5 | 248,8 $\pm$ 13,1 | 284,5 $\pm$ 4,9  | 157,9 $\pm$ 10,7 | 177,9 $\pm$ 28,9 | 166 $\pm$ 8,6    |                        |
| <i>H. laricifolium</i>                                | 564,9 $\pm$ 94,4  | 733,5 $\pm$ 27,2  | 549,6 $\pm$ 27,5 | 538,1 $\pm$ 105  | 830,6 $\pm$ 81,8 | 606,7 $\pm$ 39,3 | 438,2 $\pm$ 106  | 560,8 $\pm$ 43,5 |                        |
| <i>L. thuyoides</i>                                   | 418,7 $\pm$ 11,4  | 364,0 $\pm$ 42,6  | 363,7 $\pm$ 55   | 342,2 $\pm$ 7,2  | 496,4 $\pm$ 38,8 | 428,3 $\pm$ 24,8 | 229,7 $\pm$ 15,9 | 209 $\pm$ 28,8   |                        |
| <i>R. macrochaeta</i>                                 | 188,2 $\pm$ 34,3  | 267,3 $\pm$ 105,8 | 314,2 $\pm$ 29,4 | 352,8 $\pm$ 34,1 | 294,6 $\pm$ 52,1 | 354,5 $\pm$ 41,9 | 158 $\pm$ 28,2   | 169,7 $\pm$ 13,5 |                        |
